# Supplementary material
Source: PubMed Central journal article supplement (PMC10658914)
Supplement: joces-134-259381-s1.pdf [file joces-134-259381-s1.pdf]

A

|               |  | Eukaryotes   |       |               |           |        |          |             |              |           |            |            |            |            |
|---------------|--|--------------|-------|---------------|-----------|--------|----------|-------------|--------------|-----------|------------|------------|------------|------------|
|               |  | Opisthokonta |       |               |           |        |          |             |              |           |            |            |            |            |
|               |  | Bilateria    |       |               |           |        |          |             |              |           |            |            |            |            |
|               |  | Mammals      |       |               |           |        |          |             |              |           |            |            |            |            |
| Genes         |  | Excavata     | SAR   | Archeplastide | Amoebozoa | Fungi  | Cnidaria | Protostomia | Osteichthyes | Amphibian | Sauropsida | Monotremes | Marsupials | Eutherians |
| <i>Lrrc23</i> |  | Green        | Green | Yellow        | Yellow    | Yellow | Yellow   | Green       | Green        | Green     | Green      | Green      | Green      | Green      |

B

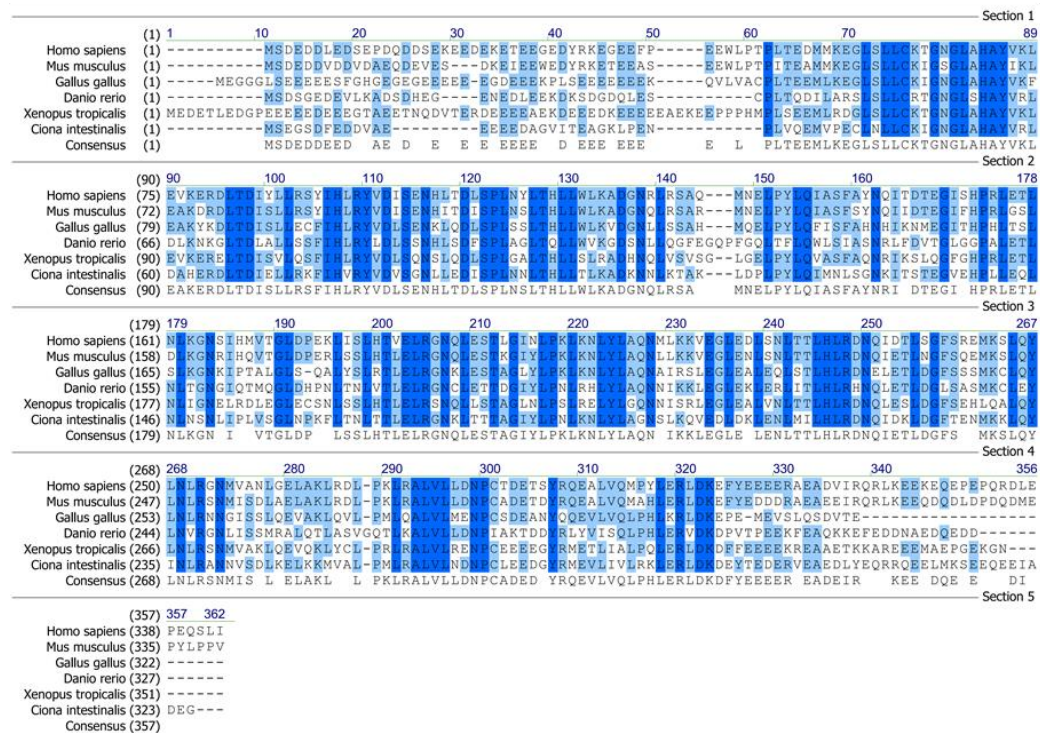

**Fig. S1. *Lrrc23* is an evolutionarily conserved gene.** (A) *Lrrc23* is present in the most of eukaryotes that utilize flagella (SAR: stramenopiles, alveolates, Rhizaria). Green denotes *Lrrc23* by the most of species within the indicated taxon, whereas yellow indicates a loss of this gene within several species within the indicated taxon. (B) LRRC23 protein sequence similarity across species, with dark blue corresponding to total conservation and light blue indicating conservation among three to five species.

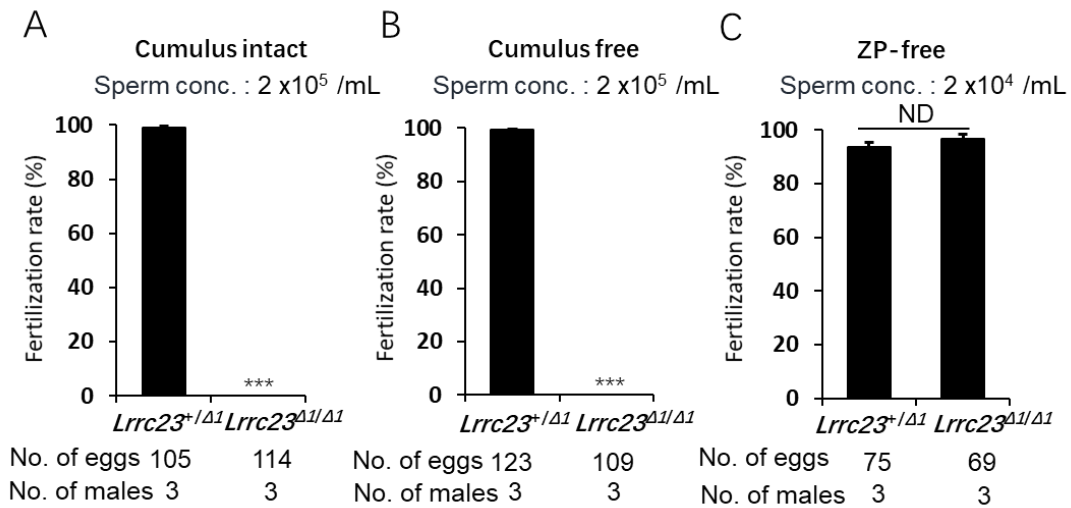

**Fig. S2. Assessment of the fertility of spermatozoa from *Lrrc23*<sup>Δ1/Δ1</sup> mice.** (A) Fertilization rates (percentages of two pronuclei [2PN] eggs) in cumulus-intact oocytes inseminated with spermatozoa from *Lrrc23*<sup>+/Δ1</sup> and *Lrrc23*<sup>Δ1/Δ1</sup> mice, N = 3, \*\*\*P < 0.001. (B) Fertilization rates in cumulus-free oocytes generated with spermatozoa from *Lrrc23*<sup>+/Δ1</sup> and *Lrrc23*<sup>Δ1/Δ1</sup> mice, N = 3, \*\*\*P < 0.001. (C) Fertilization rates in ZP-free oocytes generated with spermatozoa from *Lrrc23*<sup>+/Δ1</sup> and *Lrrc23*<sup>Δ1/Δ1</sup> mice, N = 3, P > 0.05. Error bars represent S.D. Student's t-test.

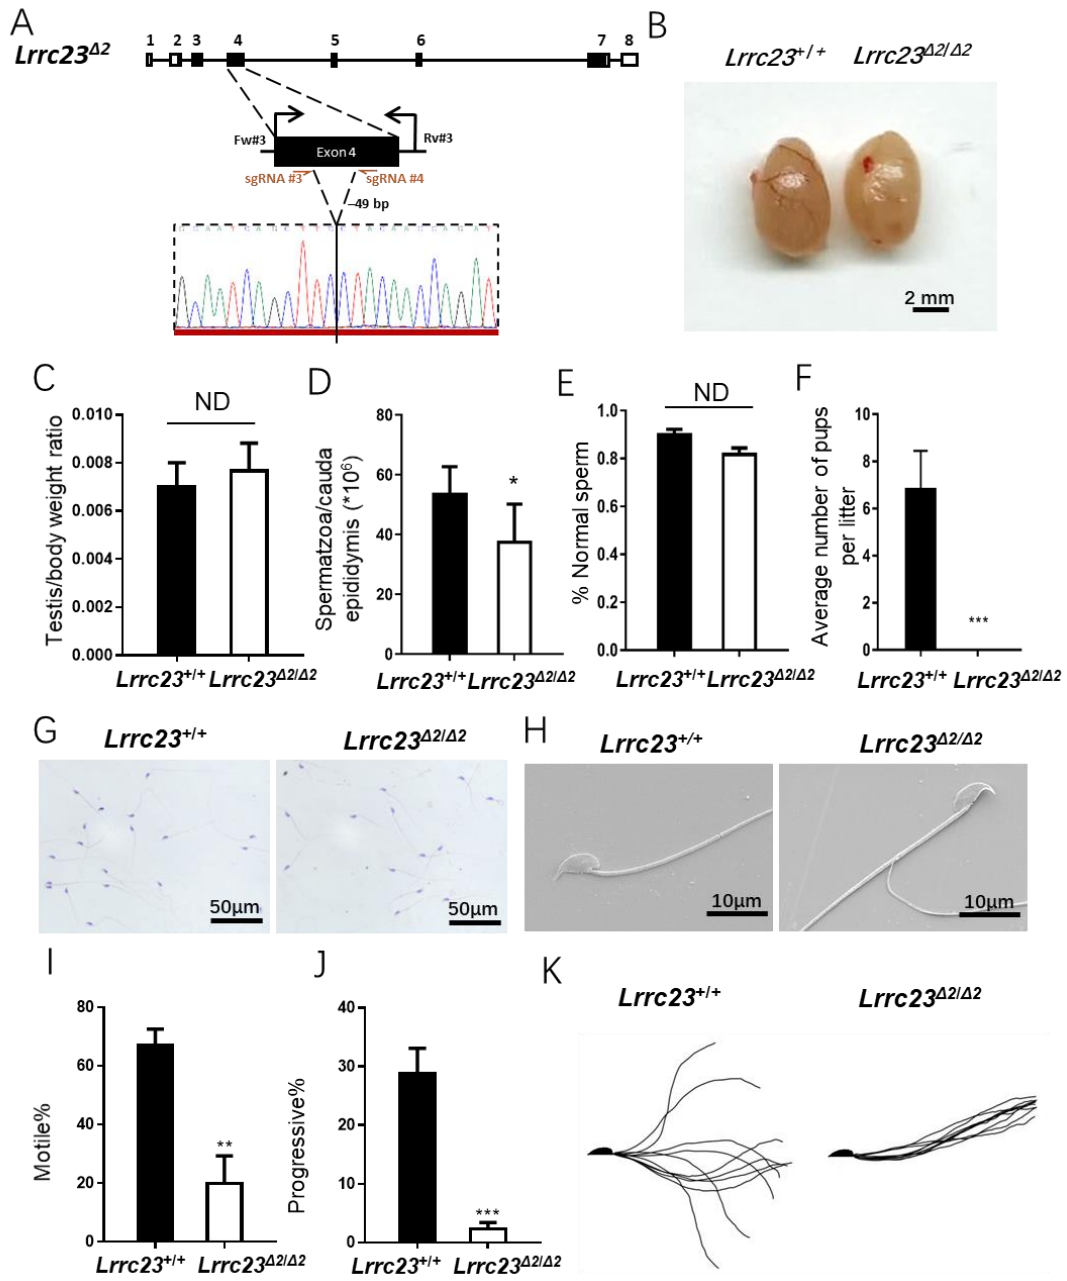

**Fig. S3. Generation and analysis of male *Lrrc23*<sup>A2/A2</sup> mice.** (A) Dual sgRNAs (sgRNA#3 and sgRNA#4) were used to target *Lrrc23* exon 4, with Sanger sequencing being used to confirm the successful deletion of a 49 bp fragment within this region. Black rectangles are used to denote the coding regions, and genotyping primers (Fw#3, Rv#3) were as shown. (B) Testes of *Lrrc23*<sup>+/+</sup> and *Lrrc23*<sup>A2/A2</sup> mice. (C) Average testis weight/body weight in *Lrrc23*<sup>+/+</sup> and *Lrrc23*<sup>A2/A2</sup> mice, N = 3, P > 0.05. Error bars represent S.D. Student's t-test. (D) Cauda epididymal sperm contents from *Lrrc23*<sup>+/+</sup> and *Lrrc23*<sup>A2/A2</sup> mice, N = 3, P > 0.05. Error bars represent S.D. Student's t-test. (E) Normal epididymal sperm counts from *Lrrc23*<sup>+/+</sup> and *Lrrc23*<sup>A2/A2</sup> mice, N = 3, P > 0.05. Error bars represent S.D. Student's t-test. (F) Average numbers of pups per litter from *Lrrc23*<sup>+/+</sup> and *Lrrc23*<sup>A2/A2</sup> mice, N = 3, \*\*\*P < 0.001. Error bars represent S.D. Student's t-test. (G) Spermatozoa from *Lrrc23*<sup>+/+</sup> and *Lrrc23*<sup>A2/A2</sup> mice were subjected to hematoxylin and eosin staining. (H) SEM was used to image WT and *Lrrc23* knockout spermatozoa. (I) average percentages of motile spermatozoa and (J) progressively motile spermatozoa from *Lrrc23*<sup>+/+</sup> and *Lrrc23*<sup>A2/A2</sup> mice were quantified, N = 3, \*\*P < 0.01, \*\*\*P < 0.001. Error bars represent S.D. Student's t-test. (K) Flagellar waveforms for spermatozoa from *Lrrc23*<sup>+/+</sup> and *Lrrc23*<sup>A2/A2</sup> mice were assessed following a 5 min incubation.

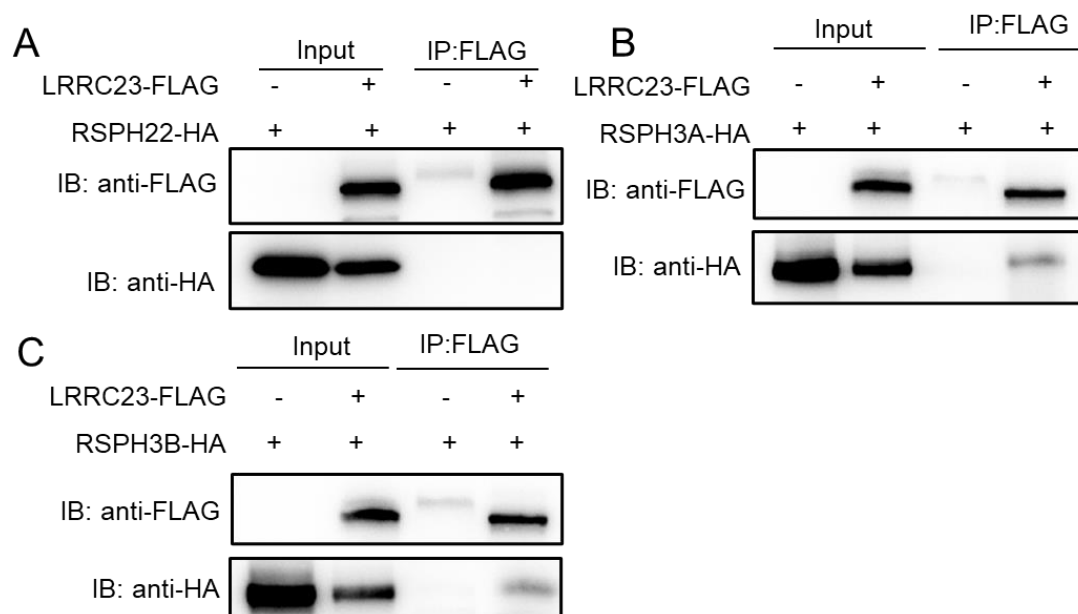

**Fig. S4. LRRC23 is a radial spoke complex component that interacts with other proteins within this complex.** (A, B and C) Co-immunoprecipitation of LRRC23-FLAG and RSPH-HA was conducted using anti-FLAG-conjugated beads to examine interactions between these two proteins. Input: whole cell lysates from experimental cells; IP: samples immunoprecipitated with anti-FLAG beads. In HEK293T cells, LRRC23 was able to interact with other RS proteins including RSPH22 (A), RSPH3A (B), and RSPH3B (C).

A Localization of RSPH6A in *Lrrc23* WT and KO sperm

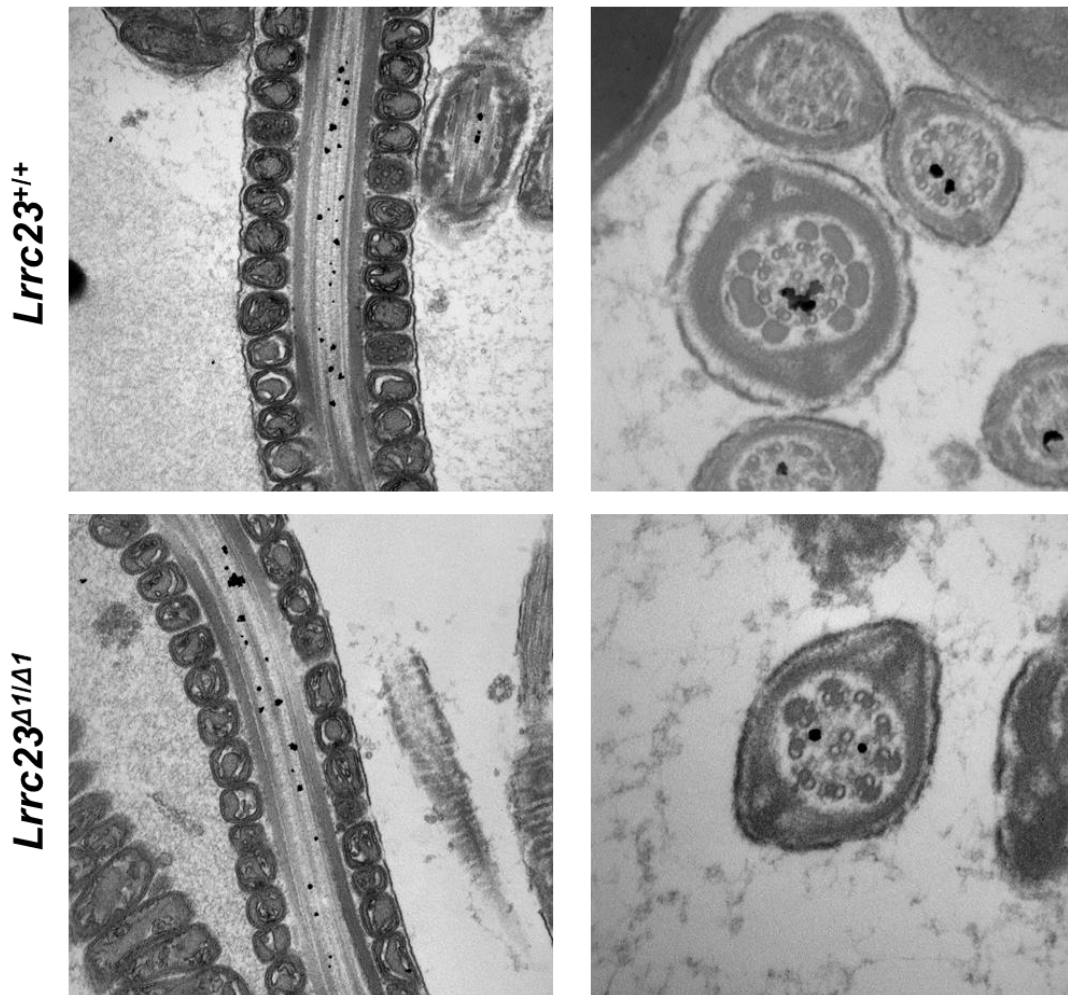

B Comparison of RSPH6A and LRRC23 localization in WT sperm

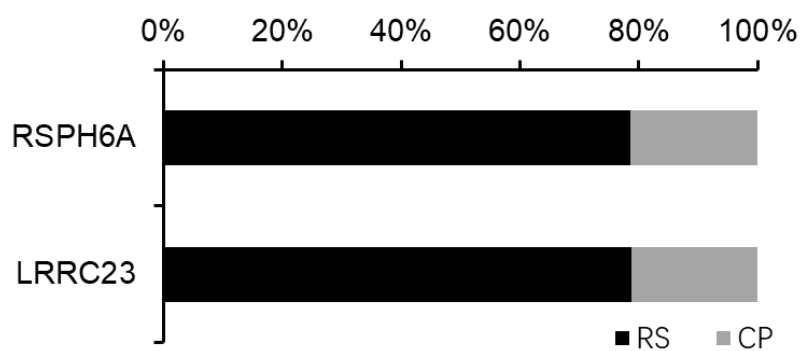

**Fig. S5. Analysis of the localization of RSPH6A in the spermatozoa of WT and *Lrrc23*<sup>Δ1/Δ1</sup> mice by immunoelectron microscopy. (A) RSPH6A antibody-conjugated gold particles were mostly localized to the radial spokes. (B) Comparison of RSPH6A and LRRC23 localization in WT sperm. Both RSPH6A and LRRC23 showed major localization to the radial spokes (RS) and minor localization to the central pair (CP).**



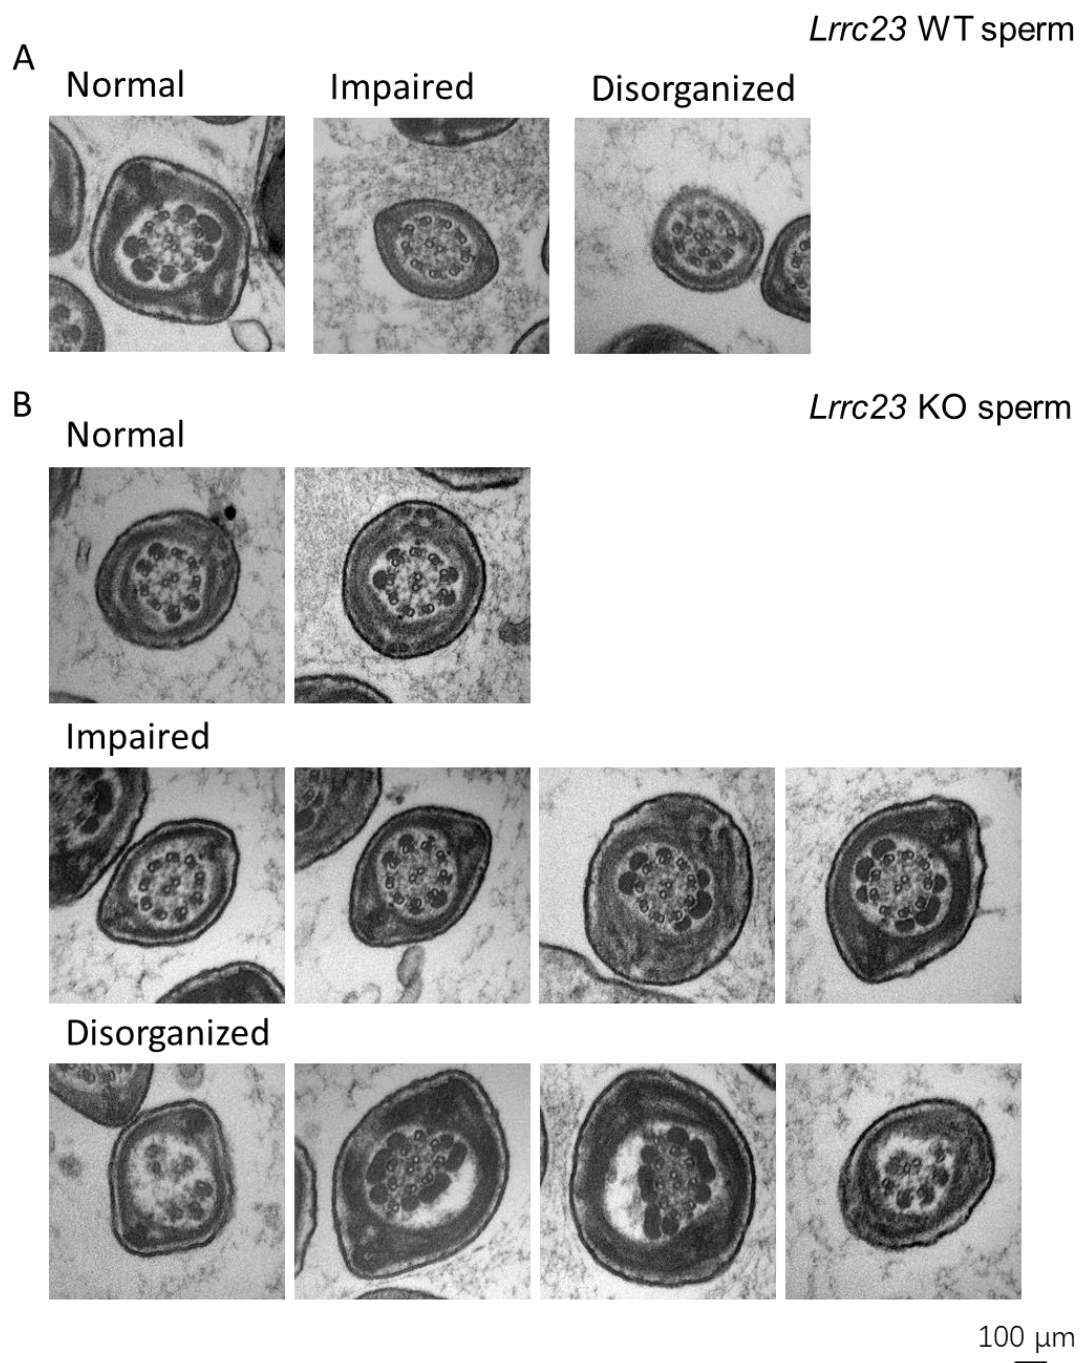

**Fig. S6. Ultrastructural analysis of the axonemal structures in WT and *Lrrc23* KO spermatozoa by TEM.** (A) Cross sections show normal axonemal structures. (B) Cross sections show unclear RS structures. (C) Cross sections show disorganized microtubule structures.

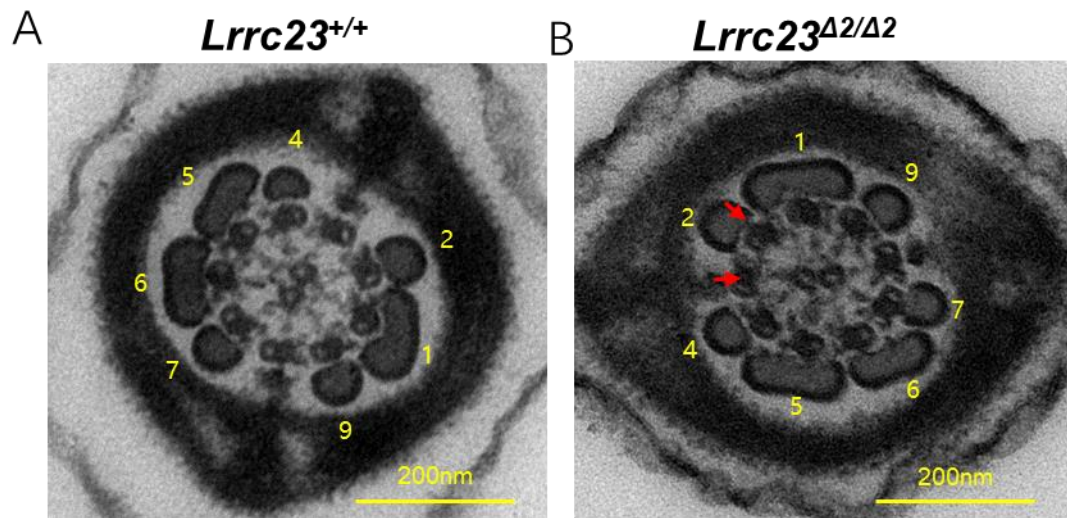

**Fig. S7. Ultrastructural assessment of spermatozoa in the cauda epididymis of *Lrrc23*<sup>Δ2/Δ2</sup> mice.** (A and B) Electron microscopy was used to assess cross sections of the principal component of spermatozoa from *Lrrc23*<sup>+/+</sup> and *Lrrc23*<sup>Δ2/Δ2</sup> mice. Outer dense fibers are marked with numbers, while the absence of a radial spoke is marked by red arrows.



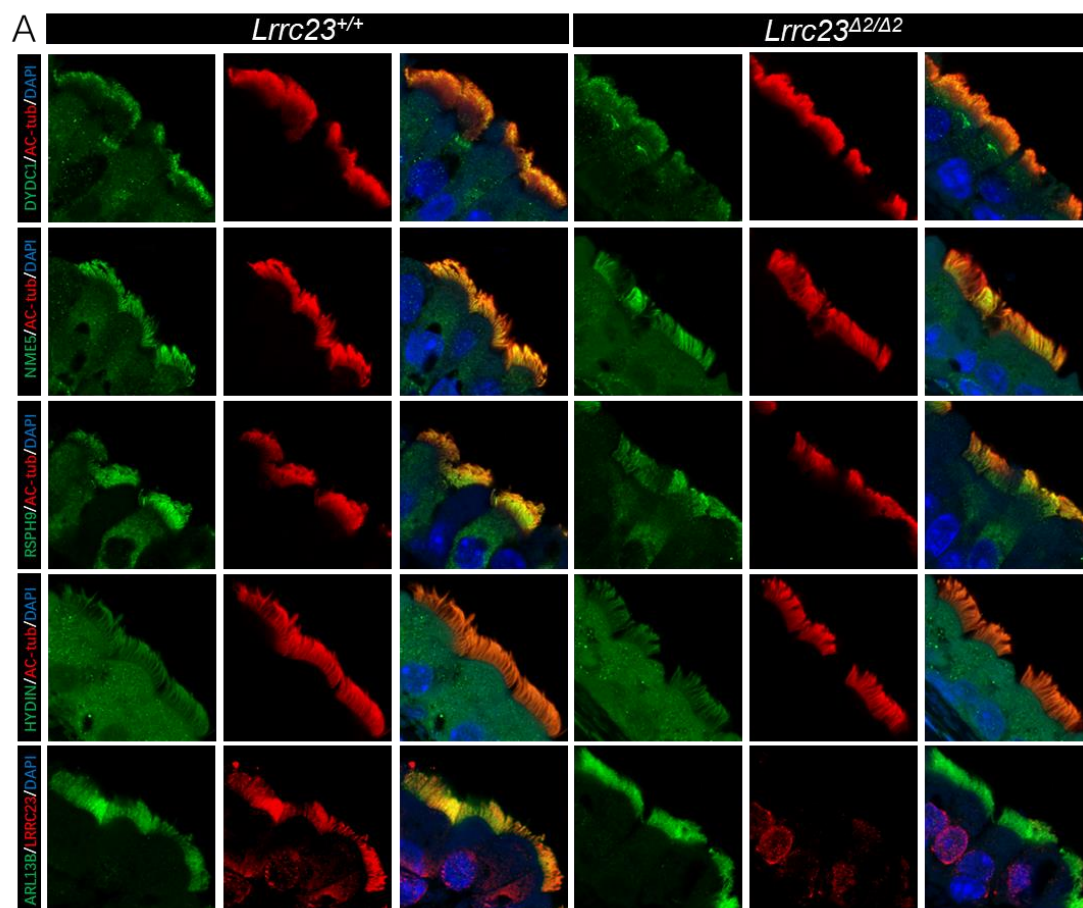

**Fig. S8. No significant differences in the tracheal cilia components of *Lrrc23*<sup>+/+</sup> and *Lrrc23*<sup>Δ2/Δ2</sup> mice.** (A) Immunofluorescent staining of respiratory tract cilia from the indicated mice was performed using antibodies specific for AC-tub, LRRC23 (red), DYDC1, NME5, RSPH9, HYDIN and ARL13B (green). ARL13B regulatory GTPase highly enriched in cilia and used as a marker of cilia. HYDIN is the component of central pairs in motile cilia and flagella. Nuclei were stained with Hoechst 33342 (blue).

**Table S1.** Primer sequences.

| Primer    | Sequence                       |
|-----------|--------------------------------|
| Fw#1:     | ACCTGCCCAAACCTTCGAGC           |
| Rv#1:     | TGGAGCCTTGTGCATACTAGG          |
| Rv#2:     | CCTTCCCACCAGTCGTCTCTA          |
| Fw trans: | GAAATTAATACGACTCACTATAGG       |
| Rv trans: | AAAAGCACCGACTCGGTGCCA          |
| Fw#3:     | ACCTCACAGACATCTCCTT            |
| Rv#4:     | AACATATACTGCCTGCTTCT           |
| Fw#4:     | CCCCTCGAGTTACAGGGCTTTCTTTCCATG |
| FLAG:     | CCCGAATTCGGAGCCGGGAGGAGACCATGT |
| 1D4:      | GAATTTATCGTCGTCATCCTTATAATC    |
| RT Fw:    | CCAAAAAACAGTCTTGGCG            |
| RT Rv:    | CAGACAGATGACTGCCAAGGA          |

**Table S2.** List of Antibodies.

| Anitigen                                | Provider                 | Catalog number |
|-----------------------------------------|--------------------------|----------------|
| FALG                                    | MBL                      | PM020          |
| Acetylated Tubulin                      | Sigma-Aldrich            | T7451          |
| AKAP3                                   | Proteintech              | 13907-1-AP     |
| HA                                      | MBL                      | M132-11        |
| AKAP4                                   | BD Biosciences           | #611564        |
| DNAH8                                   | Abcam                    | #ab121989      |
| Beta-Tubulin                            | Proteintech              | 10094-1-AP     |
| DRC3                                    | Atlas Antibodies         | HPA036040      |
| GAS8                                    | Atlas Antibodies         | HPA031703      |
| DYDC1                                   | Proteintech              | 26327-1-AP     |
| GAPDH                                   | Santa Cruz Biotechnology | #sc-25778      |
| LRRC23                                  | Laboratory of MingXi Liu |                |
| LRRC23                                  | Laboratory of M.I        |                |
| RSPH1                                   | Laboratory of M.I        |                |
| NME5                                    | Proteintech              | 12923-1-AP     |
| RSPH4A                                  | Atlas Antibodies         | HPA031198      |
| RSPH6A                                  | Laboratory of M.I        |                |
| RSPH9                                   | Proteintech              | 23253-1-AP     |
| RSPH9                                   | Atlas Antibodies         | HPA031703      |
| DYNLL2                                  | Proteintech              | 16811-1-AP     |
| RSPH3                                   | Proteintech              | 17603-1-AP     |
| SLC2A3                                  | Laboratory of M.I        | KS64-10        |
| ARL13B                                  | Proteintech              | 17711-1-AP     |
| HYDIN                                   | Proteintech              | 24741-1-AP     |
| Rabbit IgG                              | CST                      | 2729           |
| Mouse IgG (HRP conjugated)              | Jackson ImmunoResearch   | 115-036-062    |
| Rabbit IgG (HRP conjugated)             | Jackson ImmunoResearch   | 111-036-045    |
| Rat IgG (HRP conjugated)                | Jackson ImmunoResearch   | 112-035-167    |
| Donkey anti-Mouse IgG, Alexa Fluor 488  | Invitrogen               | A-21202        |
| Donkey anti-Rabbit IgG, Alexa Fluor 488 | Invitrogen               | A-21206        |
| Donkey anti-Goat IgG, Alexa Fluor 555   | Invitrogen               | A-21432        |
| Donkey anti-Rabbit IgG, Alexa Fluor 555 | Invitrogen               | A-31572        |
| Goat anti-Rabbit IgG, HRP               | Invitrogen               | 31460          |
| Goat anti-Mouse IgG, HRP                | Invitrogen               | 31430          |

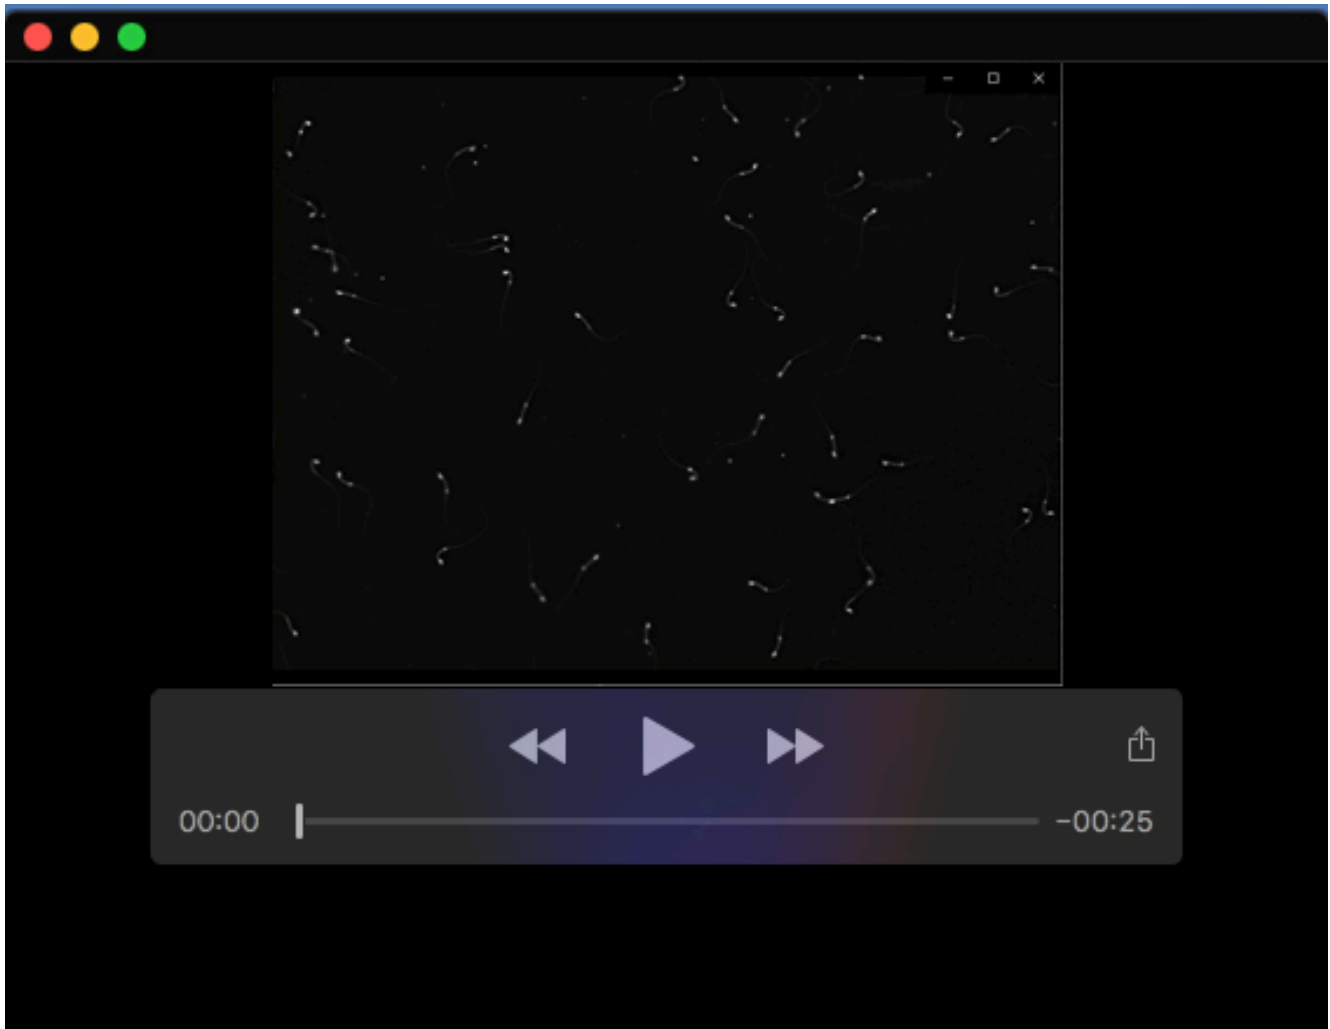

**Movie S1. Spermatozoa from *Lrrc23<sup>+Δ1</sup>* mice.** Spermatozoa of *Lrrc23<sup>+Δ1</sup>* mice at 10 min of incubation in TYH media. Movie is recorded at 200 frames/second using an Olympus BX-53 microscope equipped with a high-speed camera (HAS-L1, Ditect, Tokyo, Japan).

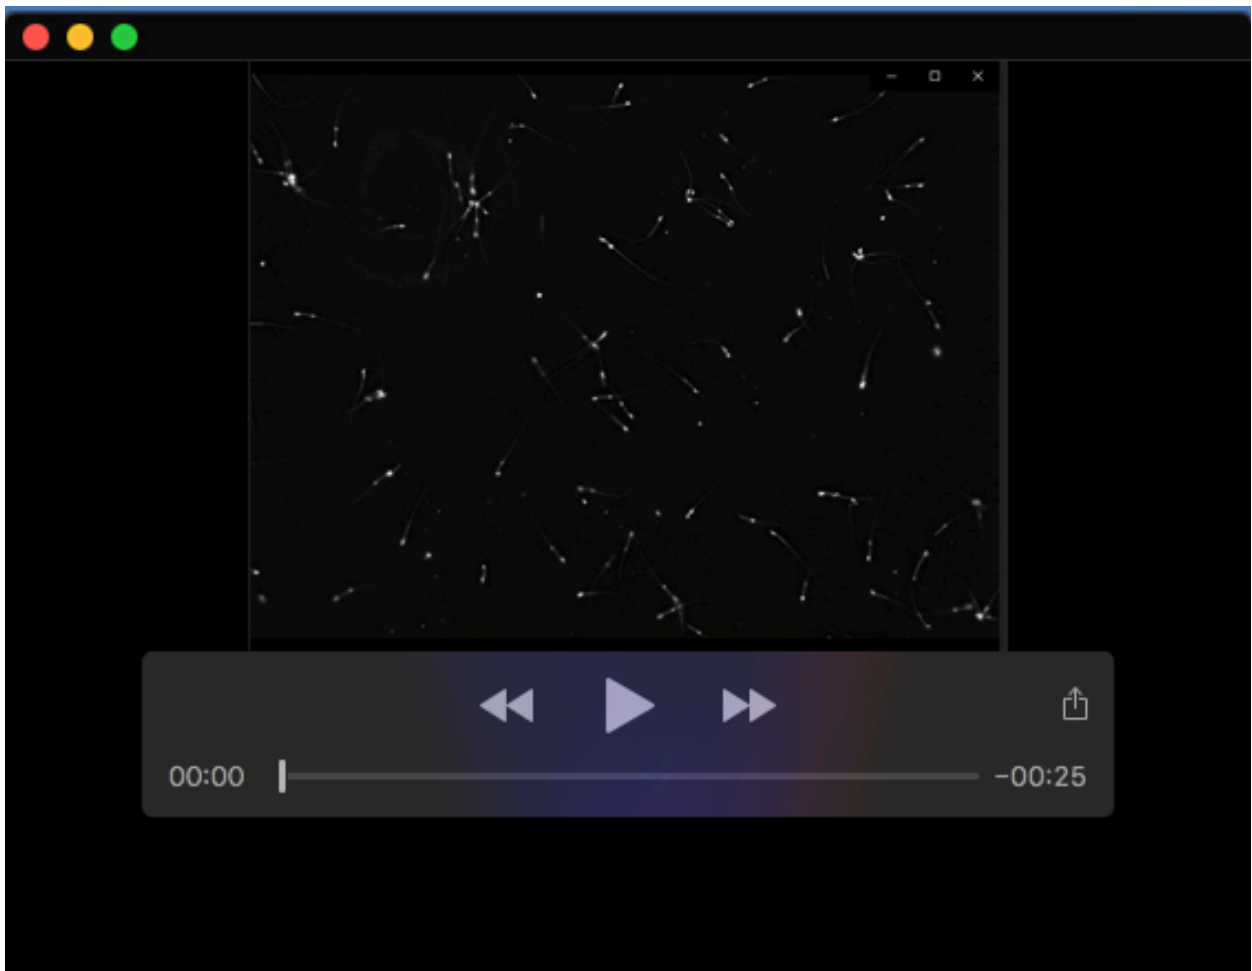

**Movie S2. Spermatozoa from *Lrrc23*<sup>Δ1/Δ1</sup> mice.** Spermatozoa of *Lrrc23* knockout mice at 10 min of incubation in TYH media. Movie is recorded at 200 frames/second using an Olympus BX-53 microscope equipped with a high-speed camera (HAS-L1, Ditect, Tokyo, Japan).



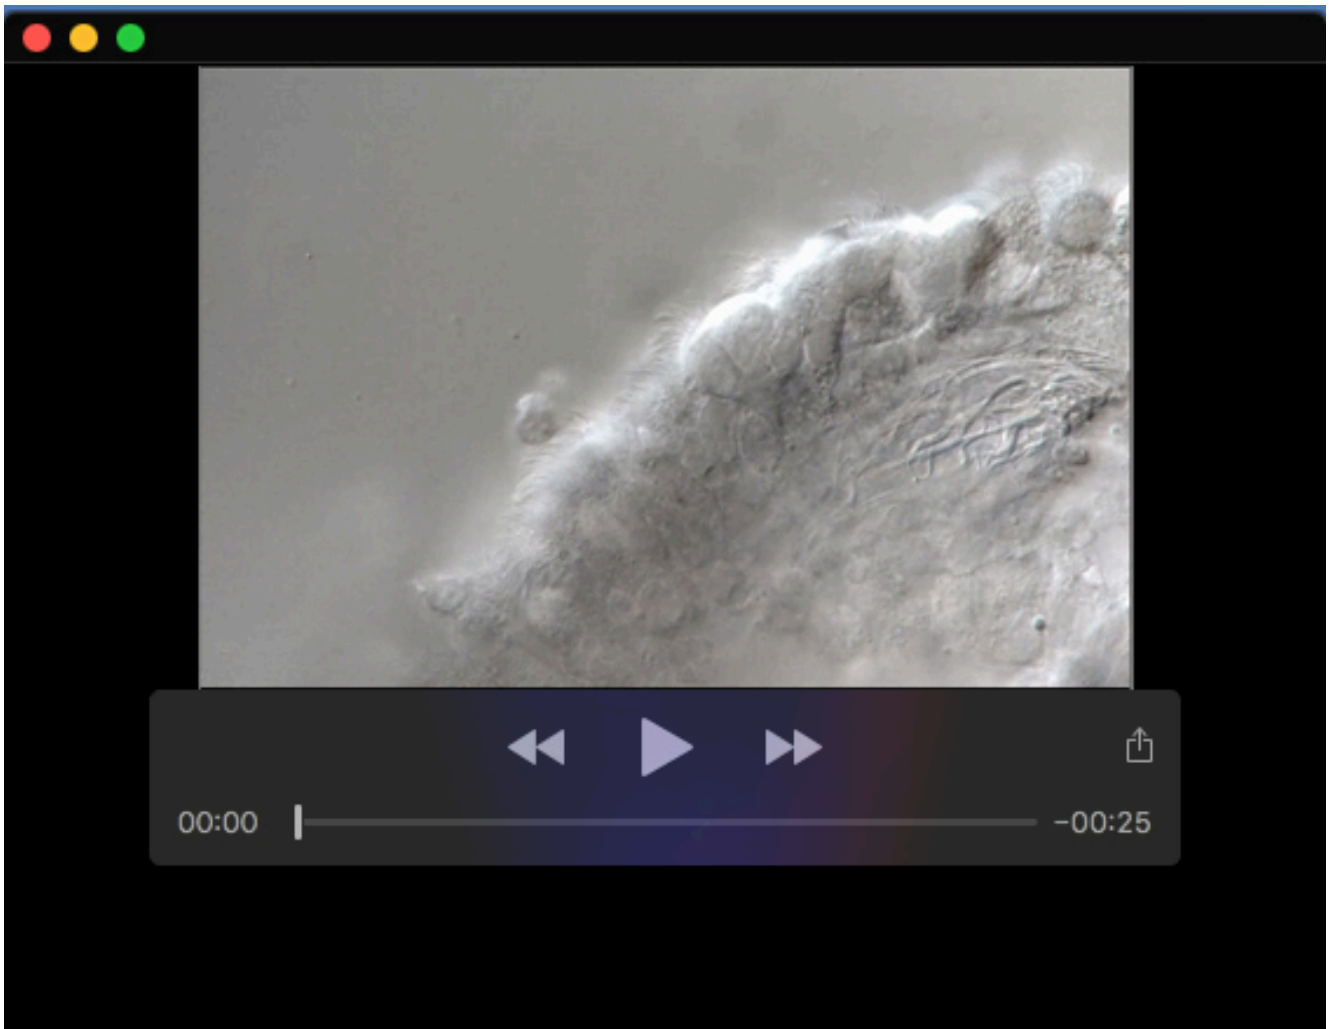

**Movie S3.** The beating of respiratory cilia in *Lrrc23*<sup>+/+</sup> mice.

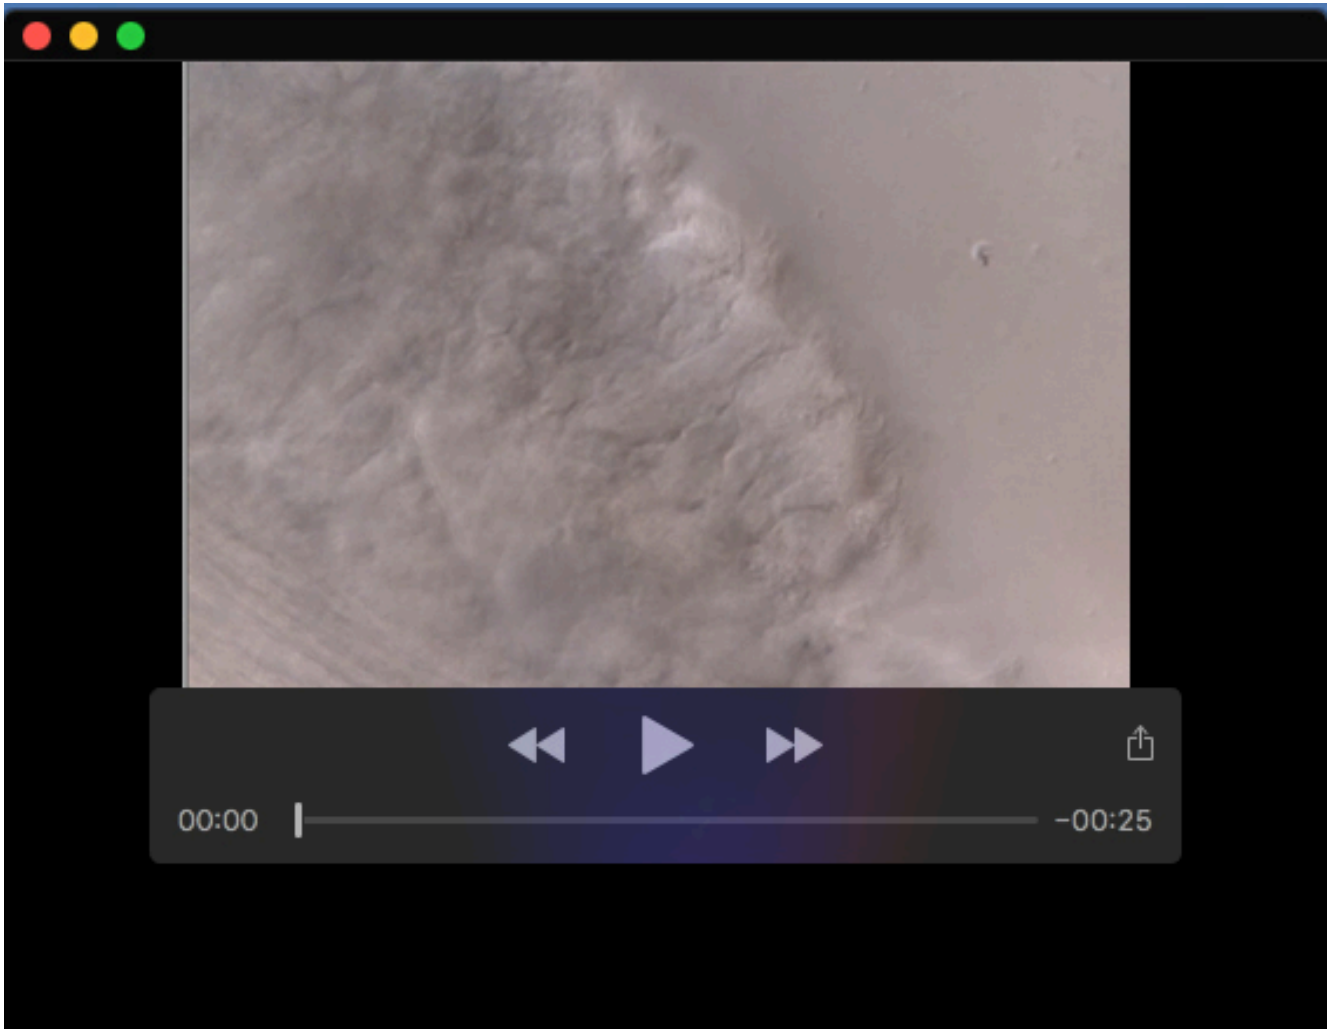

**Movie S4. The beating of respiratory cilia in *Lrrc23*<sup>A2/A2</sup> mice.**

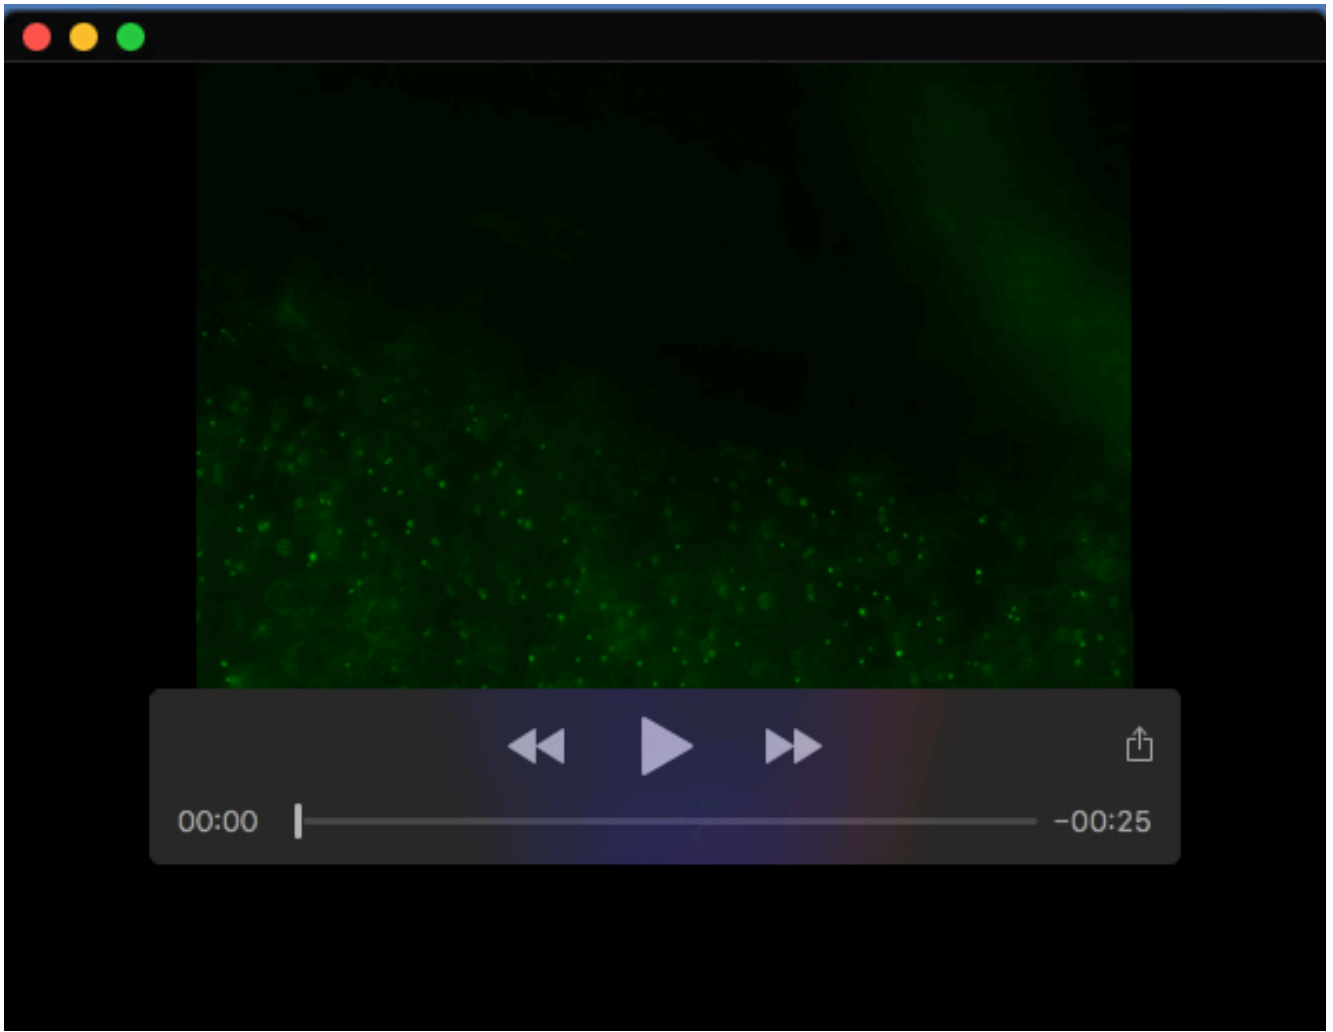

**Movie S5.** Cilia generated flow in *Lrrc23* WT multiciliated tracheal cells.

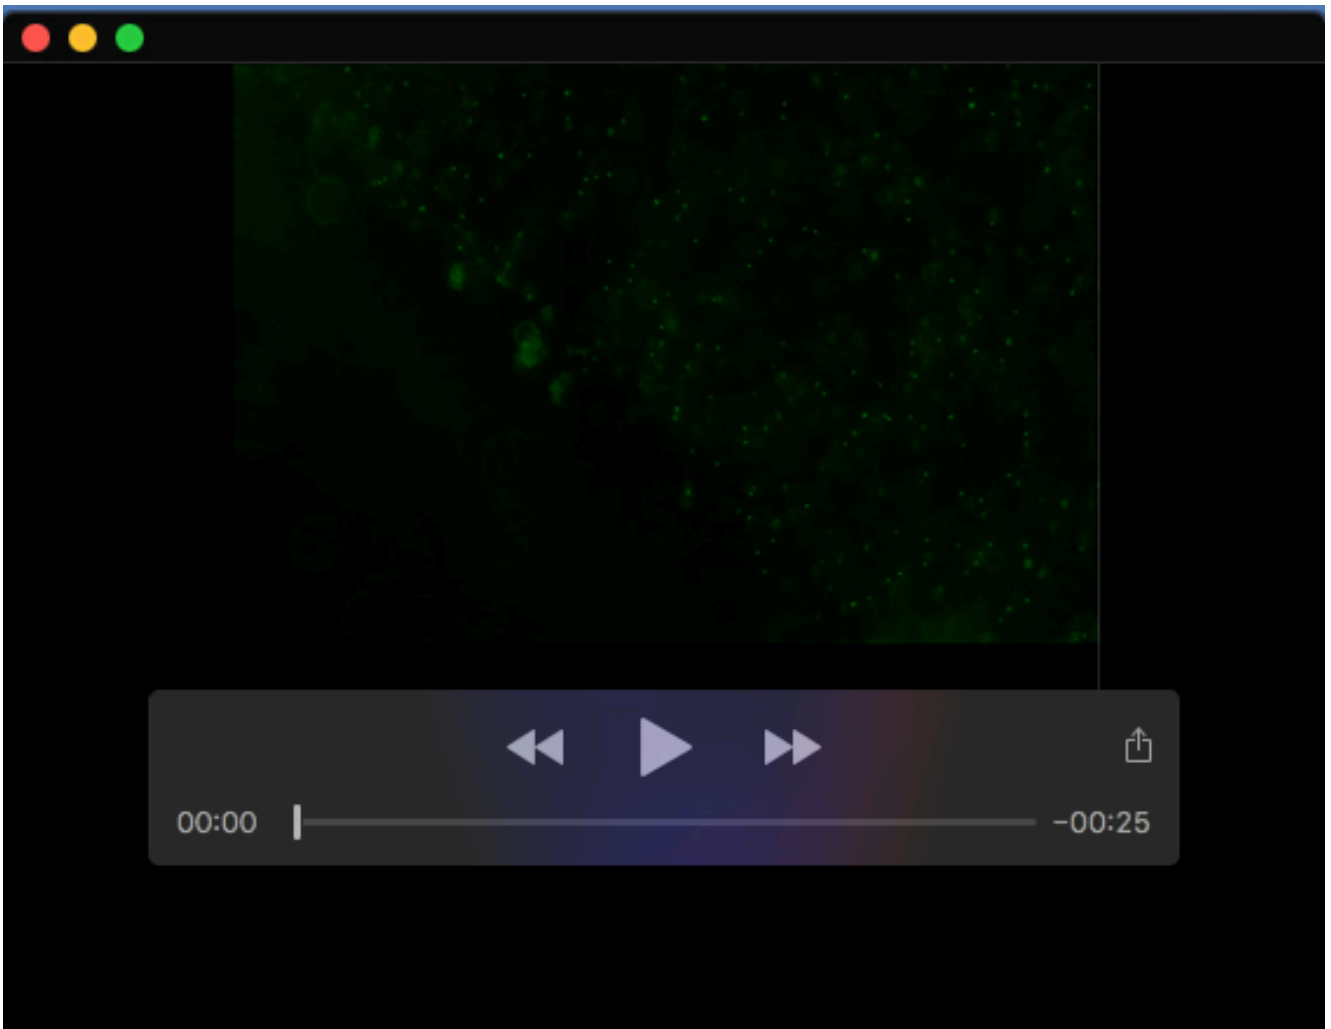

**Movie S6. Cilia generated flow in *Lrrc23* KO multiciliated tracheal cells.**
